# Supplementary material
Source: publisher site journal article supplement (https://www.dovepress.com/article/220027)
Supplement: Supplementary file 1 [file get_supplementary_file.php]

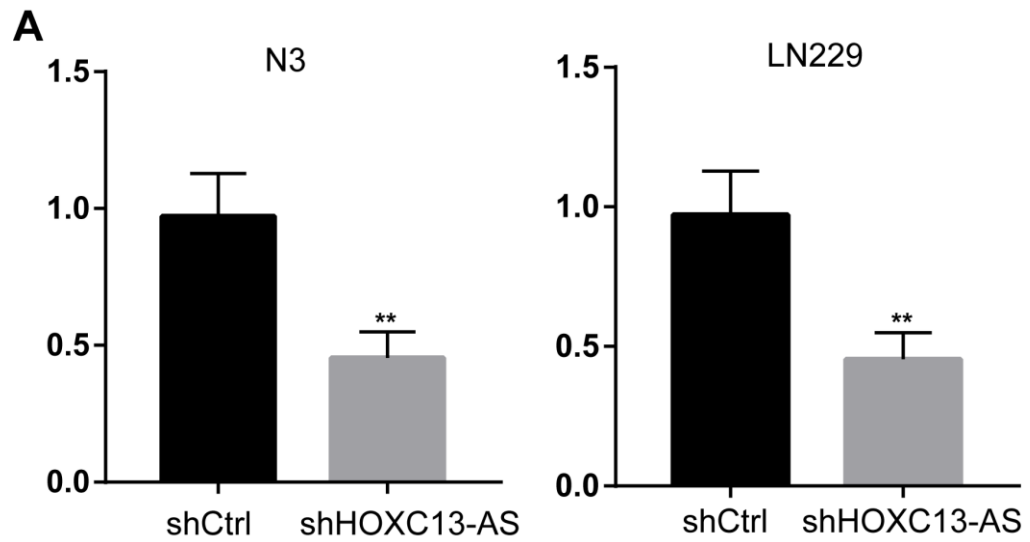

**Supplementary Figure 1**

A. The expression level of HOXC13-AS is detected by qRT-PCR analysis after shHOXC13-AS transfection.

Each experiment is carried out for three times, and data are expressed mean  $\pm$  SD. \*\* $p < 0.01$ .

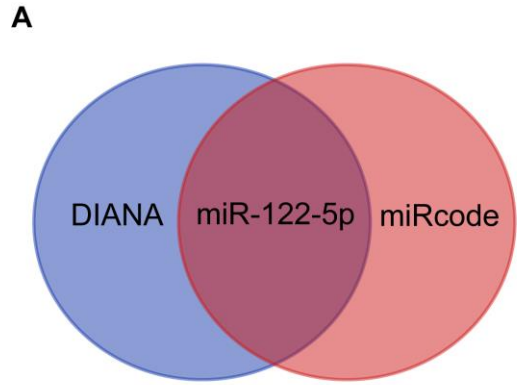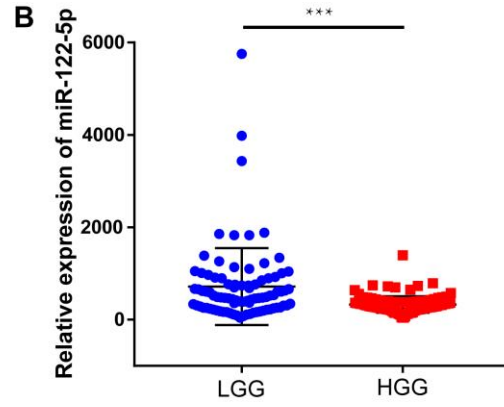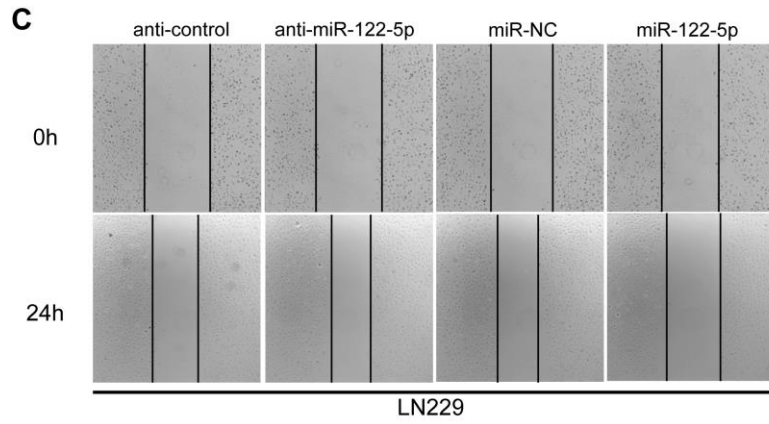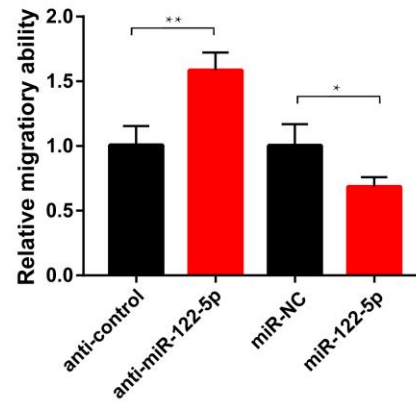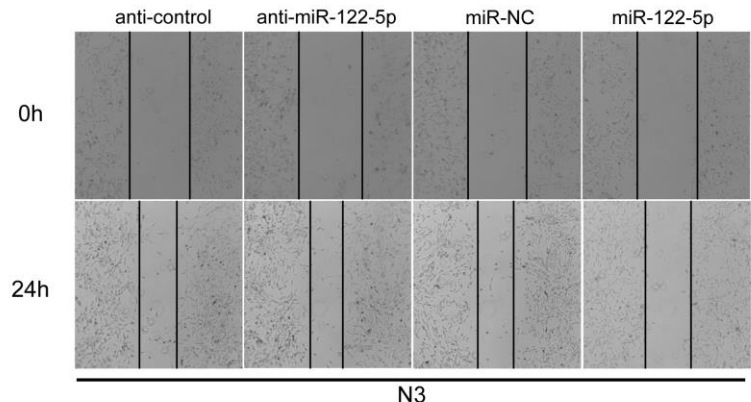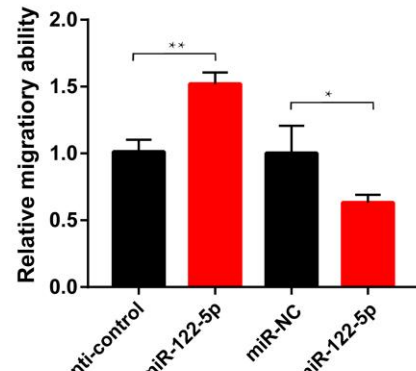

## Supplementary Figure 2

- Bioinformatics predicts the binding sites of HOXC13-AS with miR-122-5p in two databases.
- Relative expression of miR-122-5p in LGG and HGG in CGGA database.
- Wound healing assay is performed in LN229 and N3 cells to detect migration ability after transfected with miR-122-5p mimics or miR-122-5p inhibitor.

Data represents three independent experiments  $\pm$  SD. \*\*\* $p < 0.001$ .

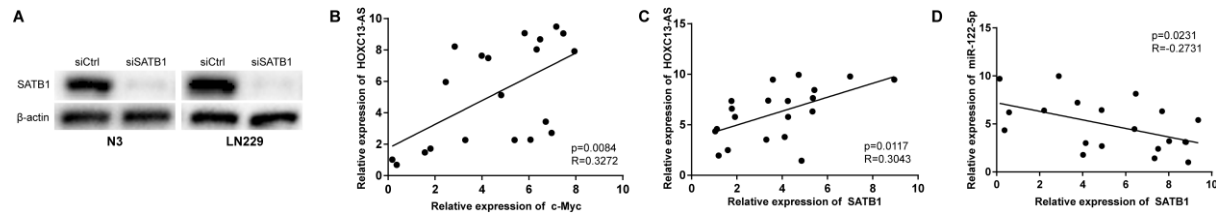

## Supplementary Figure 3

- SATB1 expression level is determined by Western blotting assay after siSATB1 transfection, with  $\beta$ -actin as a loading control.
- Relative expression of HOXC13-AS and c-Myc were detected by qRT-PCR and the results were showed as linear regression analyses.
- Relative expression of HOXC13-AS and SATB1 were detected by qRT-PCR and the results were showed as linear regression analyses.
- Relative expression of miR-122-5p and SATB1 were detected by qRT-PCR and the results were showed as linear regression analyses.

**Supplementary table S1. Primers for qRT-PCR**

---

| <b>Primers used for quantitative RT-PCR</b> |                                          |                                             |
|---------------------------------------------|------------------------------------------|---------------------------------------------|
| <b>Gene</b>                                 | <b>Forward-primer (5'-3')</b>            | <b>Reverse-primer(5'-3')</b>                |
| HOXC13-AS                                   | ACCCCTCAAGTGGAGAGCAA                     | GGGTGCTCTCAACCGTCAAA                        |
| miR-122-5p                                  | GGGGTGGAGT GTGACAATG                     | CAGTGC GTGTCGTGGAGT                         |
| SATB1                                       | AGAGCTAGCGAGGGAGAGAG                     | CTAGAGTCGCCCTGGCTTTC                        |
| c-Myc                                       | GGCGCTTTGCACTGGA                         | GCGTCGGGAGAGTCGC                            |
| $\beta$ -actin                              | GTCATTCAAATATGAGATGCGT                   | GCATTACATAATTTACACGAAAGCA                   |
| U6                                          | <a href="#"><u>CTCGCTTCGGCAGCACA</u></a> | <a href="#"><u>AACGCTTCACGAATTTGCGT</u></a> |

---

**Supplementary table S2. Primer for CHIP assays**

---

| <b>Primers used for CHIP experiments</b> |                     |                               |                               |
|------------------------------------------|---------------------|-------------------------------|-------------------------------|
| <b>Gene</b>                              | <b>Binding site</b> | <b>Forward-primer (5'-3')</b> | <b>Reverse-primer (5'-3')</b> |
|                                          | <b>Site 1</b>       | TCACACTAAACCCATTGCACA         | CTTAGGAGATTGGGGTCCAGC         |
| <b>HOXC13-</b>                           | <b>Site 2</b>       | GCTGGACCCCAATCTCCTAA          | TCACCTACCCTGTATTGGCT          |
| <b>AS</b>                                | <b>Site 3</b>       | AGAAGTCAGGGTGCCTAGTGT         | GACCCAAAGACCTCCTAAGGG         |

---



**Supplementary table 3. Clinicopathological features of 20 glioma patients**

| Characteristic           | All patient |             |
|--------------------------|-------------|-------------|
|                          | LGG<br>(7)  | HGG<br>(13) |
| <b>Sex (n)</b>           |             |             |
| Male                     | 4           | 8           |
| Female                   | 3           | 5           |
| <b>age</b>               |             |             |
| ≥45                      | 4           | 9           |
| <45                      | 3           | 4           |
| <b>KPS score</b>         |             |             |
| ≥80                      | 5           | 6           |
| <80                      | 2           | 7           |
| <b>Tumor location</b>    |             |             |
| Frontal                  | 5           | 7           |
| Non-frontal              | 2           | 6           |
| <b>Radiation therapy</b> |             |             |
| Yes                      | 3           | 12          |
| No                       | 4           | 1           |
| <b>TMZ chemotherapy</b>  |             |             |
| Yes                      | 2           | 11          |
| No                       | 5           | 2           |
| <b>IDH1/2 genotype</b>   |             |             |
| Mutation                 | 4           | 5           |
| Wild-type                | 3           | 8           |

Abbreviations: KPS, Karnofsky performance status; IDH1/2, isocitrate dehydrogenase 1 and 2; TMZ, temozolomide
